# Supplementary material for: On the Reactivity of N-tert-Butyl-1,2-Diaminoethane: Synthesis of 1-tert-Butyl-2-Imidazoline, Formation of an Intramolecular Carbamate Salt from the Reaction with CO2, and Generation of a Hydroxyalkyl-Substituted Imidazolinium Salt
Source: Hindawi journal article supplement (doi:10.1155/2019/1094173), 2019-02-05
Supplement: f1 [file 1094173.f1.docx]

**Electronic supporting information for: On the reactivity of N-*tert*-butyl-1,2-diaminoethane: Synthesis of 1-*tert*-butyl-2-imidazoline, formation of an intramolecular carbamate salt from the reaction with CO2 and generation of a hydroxyalkyl-substituted imidazolinium salt**

Kieren J. Evans, Ben Potrykus and Stephen M. Mansell*

Institute of Chemical Sciences, School of Engineering and Physical Sciences, Heriot-Watt University, Edinburgh, EH14 4AS, UK.

* s.mansell@hw.ac.uk

**NMR spectra**

Figure S1. 1H NMR spectrum of **1** in D2O.

*

*

*

*

Figure S2. 13C{1H} NMR spectrum of **1** in D2O. * = residual *t*BuN(H)2C2H4NH2.

Figure S3. 1H NMR spectrum of1-*tert*-butyl-2-imidazoline (**2**) in CDCl3.

Figure S4. 13C{1H} NMR spectrum of1-*tert*-butyl-2-imidazoline (**2**) in CDCl3.

Figure S5. 1H NMR spectrum of **3** in CDCl3.

Figure S6. 13C{1H} NMR spectrum of **3** in CDCl3.

Figure S7. NOESY spectrum of **3**.

Figure S8. HSQC spectrum of **3**.

**H bonding tables**

Specified hydrogen bonds for **1** (with esds except fixed and riding H)

| **H-bond** | **D-H** | **H...A** | **D...A** | **<(DHA)** |
| --- | --- | --- | --- | --- |
| N2-H2A...O2_$2 | 0.919(13) | 1.875(13) | 2.7666(10) | 163.0(11) |
| N1-H1...O2_$2 | 0.865(13) | 2.203(13) | 3.0046(10) | 154.0(11) |
| N2-H2B...O1_$1 | 0.947(13) | 1.826(13) | 2.7667(10) | 171.8(12) |
| N2-H2B...O2_$1 | 0.947(13) | 2.576(13) | 3.2437(10) | 127.8(9) |

Specified hydrogen bonds for **3** (with esds except fixed and riding H)

| **H-bond** | **D-H** | **H...A** | **D...A** | **<(DHA)** |
| --- | --- | --- | --- | --- |
| O1-H5...Cl1_$1 | 0.73(3) | 2.35(3) | 3.081(2) | 175(3) |
| C1-H1...Cl1 | 0.95 | 2.43 | 3.333(3) | 159.7 |
| C2-H2A...O1 | 0.99 | 2.46 | 3.022(3) | 115.7 |
| C2-H2B...O1_$2 | 0.99 | 2.43 | 3.246(3) | 139.2 |
| C3-H3A...Cl1_$3 | 0.99 | 2.88 | 3.714(3) | 142.8 |
| C4-H4A...Cl1 | 0.99 | 2.94 | 3.775(3) | 143.1 |
| C4-H4B...Cl1_$4 | 0.99 | 2.79 | 3.732(3) | 159.7 |
| C10-H10B...Cl1_$5 | 0.98 | 2.89 | 3.797(3) | 154.2 |


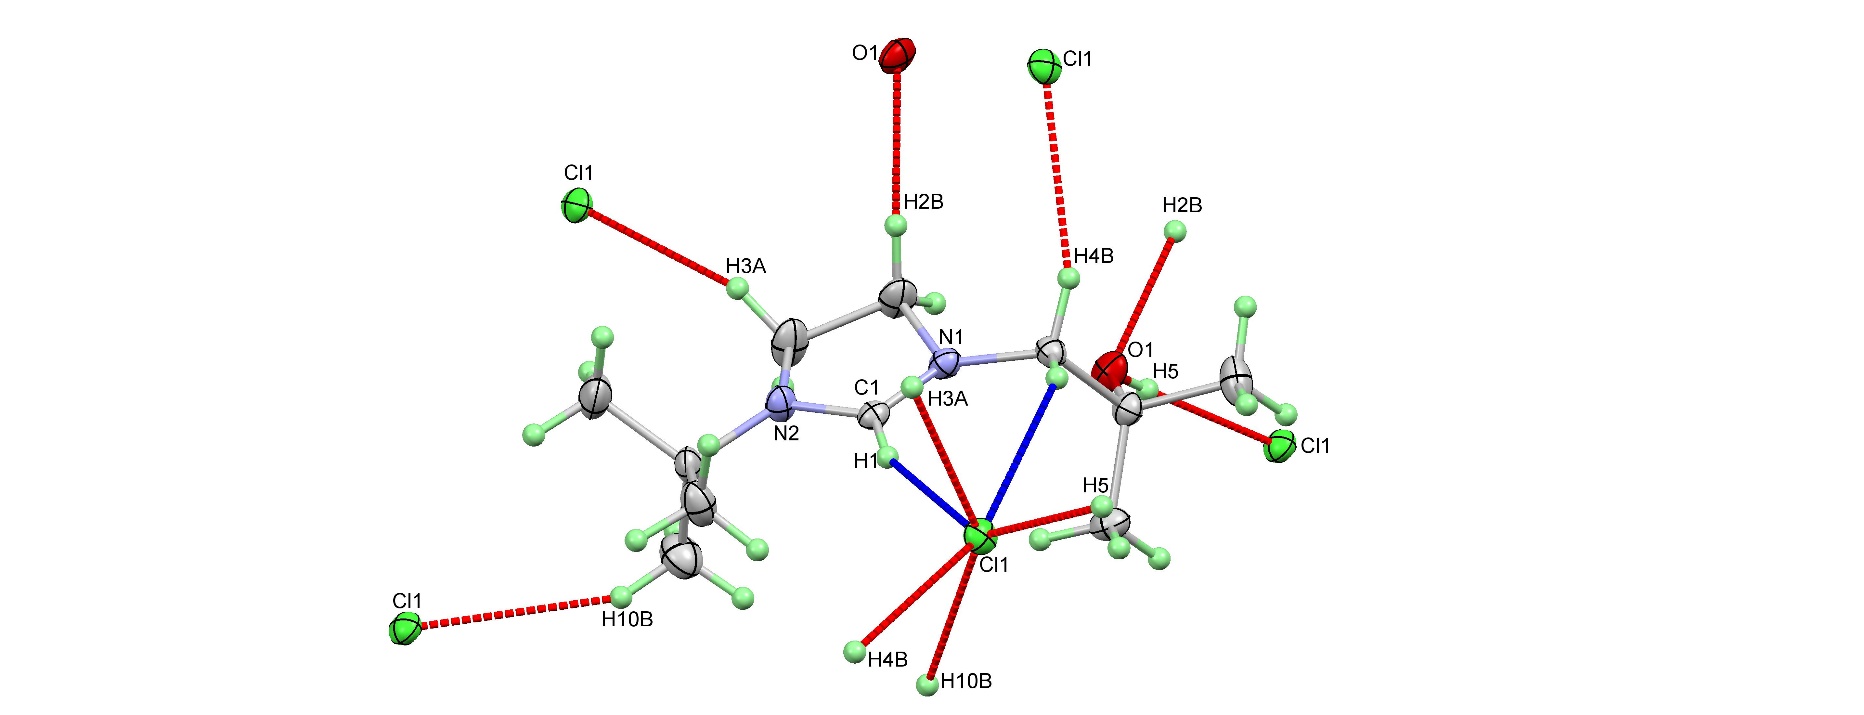


Figure S9. H-bonding and short contacts in the crystal structure of **3**.
